# Supplementary material
Source: Royal Society of Chemistry journal article supplement (doi:10.1039/d6an00306k)

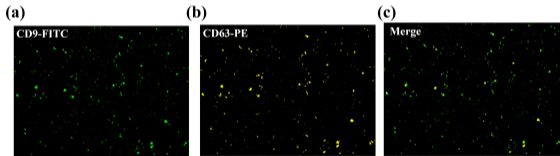

Supplement: d6an00306k2.pdf [file d6an00306k2.pdf]

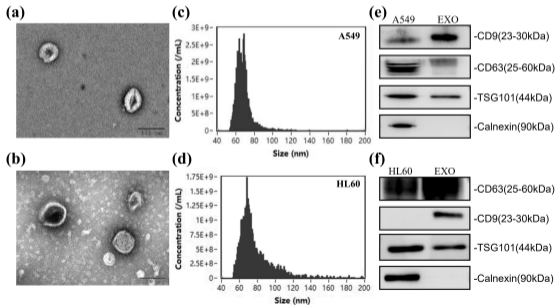

Supplement: d6an00306k3.pdf [file d6an00306k3.pdf]

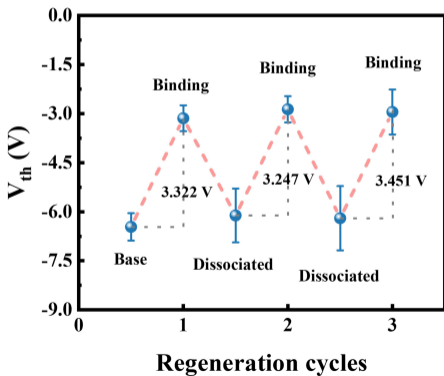

Supplement: d6an00306k4.pdf [file d6an00306k4.pdf]

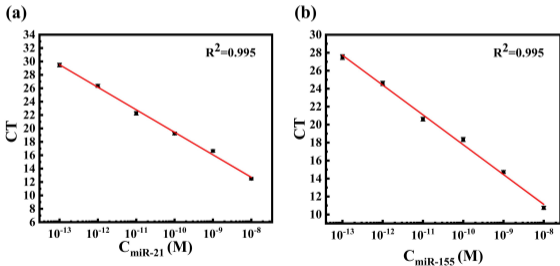

Supplement: d6an00306k5.pdf [file d6an00306k5.pdf]

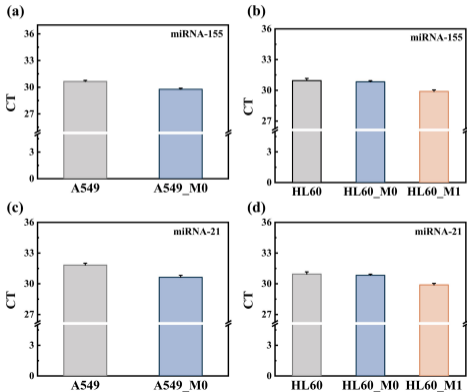

Supplement: d6an00306k6.pdf [file d6an00306k6.pdf]

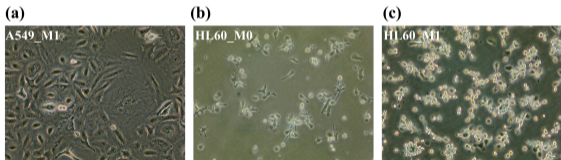

Supplement: d6an00306k7.pdf [file d6an00306k7.pdf]
